# Supplementary material for: Cenozoic record of δ34S in foraminiferal calcite implies an early Eocene shift to deep-ocean sulfide burial
Source: Springer Nature journal article supplement (doi:10.1038/s41561-018-0200-y), 2018-08-03
Supplement: MOESM2 [file 41561_2018_200_MOESM2_ESM.xlsx]

## Sheet: d34S data
Sample ID	Species	Age (Ma)	d34S raw (permil)	Offset	d34S plotted (permil)
1265A_22H1_142.5	Morozovella aragonensis	48.06	21.4073		21.4073
1265A_22H1_142.5	Morozovella aragonensis	48.28	21.2366		21.2366
1265A_22H2_92.5	Morozovella aragonensis	48.49	20.8619		20.8619
1265A_22H2_142.5	Morozovella aragonensis	48.69	20.7217		20.7217
1265A_22H3_92.5	Morozovella aragonensis	49.07	20.7985		20.7985
1265A_22H3_92.5	Morozovella caucascia	49.07	20.7377		20.7377
1265A_22H4_44.4	Morozovella caucascia	49.3976	20.7565		20.7565
1265A_22H4_60	Morozovella caucascia	49.4455	20.7056		20.7056
1265A_22H4_92.5	Morozovella caucascia	49.5451	20.7074		20.7074
1265A_22H4_142.5	Morozovella caucascia	49.7	20.5426		20.5426
1265A_22H7_40.5	Morozovella caucascia	49.8908	20.1527		20.1527
1265A_23H2_45	Morozovella aragonensis	50.9485	19.7273		19.7273
1265A_23H4_139	Morozovella aragonensis	51.3029	18.8076		18.8076
1265A_23H4_139	Morozovella lensiformis	51.3029	19.1374		19.1374
1265A_23H5_92	Morozovella lensiformis	51.3887	18.7876		18.7876
1265A_22HCC_9	Morozovella lensiformis	51.635	18.6208		18.6208
1265A_24H3_74	Morozovella lensiformis	52.1211	18.2492		18.2492
1265A_24H4_105	Morozovella lensiformis	52.28	18.593		18.593
1265A_24H6_64	Morozovella aequa	52.4765	18.4298		18.4298
1265A_25H2_64	Morozovella aequa	52.7367	18.2552		18.2552
1265A_25H3_80	Morozovella aequa	52.837	18.6078		18.6078
1265A_25H4_80	Morozovella aequa	52.93	18.5576		18.5576
1265A_25H5_64	Morozovella aequa	52.9843	18.4711		18.4711
1265A_25H5_80	Morozovella aequa	53	18.5744		18.5744
1265A_26H1_64	Morozovella aequa	53.2292	18.2911		18.2911
1265A_26H6_80	Morozovella aequa	53.4279	18.1909		18.1909
s12_28_155.exp	Morozovella aequa	54.1398	18.7878		18.7878
1265A_28H7_46	Morozovella aequa	54.3452	18.7844		18.7844
1265A_29H3_80	Morozovella aequa	54.5102	18.7388		18.7388
1262B_15H3_133	Morozovella aequa	55.087	18.2774		18.2774
1265A_29HCC_0	Morozovella aequa	55.3685	18.7573		18.7573
1262A_14H3_102.5	Morozovella aequa	55.617	18.5995		18.5995
1265A_32H1_80	Morozovella aequa	55.9	18.7825		18.7825
1265A_32H4_80	Morozovella aequa	55.9052	18.8315		18.8315
1265A_32H5_92	Morozovella aequa	55.9379	18.985		18.985
1262B_16H4_147.5	Morozovella aequa	56.103	18.7677		18.7677
1265A_34H1_70	Morozovella aequa	56.1346	19.0543		19.0543
1265A_34H3_46	Morozovella aequa	56.1909	19.1092		19.1092
1265A_35H2_80	Morozovella aequa	56.3907	19.195		19.195
1265A_35H3_138.5	Morozovella aequa	56.4332	19.2566		19.2566
1265A_15H5_35	Morozovella aequa	56.684	18.7375		18.7375
1262A_16H1_130	Morozovella aequa	57.131	18.8532		18.8532
758A_1H2_71	Globorotalia menardii	0.141643	22.2042	-1	21.2042
758A_2H2_91	Globorotalia menardii	0.630025	22.4312	-1	21.4312
758A_2H7_61	Globorotalia menardii	1.08611	22.5548	-1	21.5548
758A_4H2_76	Globorotalia menardii	2.05384	22.741	-1	21.741
758A_5H4_126	Globorotalia menardii	3.12335	23.307	-1	22.307
758A_6H2_1	Globorotalia menardii	3.70949	23.128	-1	22.128
758A_7H1_1	Globorotalia menardii	4.31309	23.1972	-1	22.1972
758A_8H5_66	Globorotalia menardii	5.4583	23.1305	-1	22.1305
758A_8H5_111	Dentoglobigerina venuzelana	5.49811	22.2936		22.2936
758A_10H5_130	Dentoglobigerina venuzelana	6.94	23.026		23.026
926A_22H4_124	Globorotalia menardii	8.7	23.8992	-1	22.8992
926A_22H4_124	Dentoglobigerina venuzelana	8.7	23.0586		23.0586
926B_25H2_114	Dentoglobigerina venuzelana	10.7	22.6888		22.6888
926B_26H4_144	Globorotalia premenardii	12.1	22.5652		22.5652
926B_26H4_144	Dentoglobigerina venuzelana	12.1	22.7453		22.7453
926B_26H4_144	Orbulina universa	12.1	21.9912	1	22.9912
1265A_6H4_65	Globigerina bulloides	12.41	21.6558	1	22.6558
1265A_6H4_65	Orbulina universa	12.41	20.3687	1	21.3687
1265A_7H1_132	Globigerina bulloides	13.67	21.8067	1	22.8067
1265A_7H3_132	Globigerina bulloides	14.3	21.9584	1	22.9584
1265A_7HCC_13	Globigerina bulloides	15.49	21.6977	1	22.6977
926B_29H7_24	Dentoglobigerina venuzelana	15.67	22.7261		22.7261
588C_2H2_110	Dentoglobigerina venuzelana	15.9106	22.6768		22.6768
1265A_8H2_88	Globigerina praebulloides	16.2	21.6122	1	22.6122
1265A_8H5_139	Globigerina praebulloides	17.25	22.1677	1	23.1677
588C_2H5_110	Dentoglobigerina venuzelana	17.39	22.7587		22.7587
1265A_9H1_38	Globigerina praebulloides	18.09	22.2809	1	23.2809
1265A_9H3_38	Globigerina praebulloides	18.82	21.9134	1	22.9134
1265A_9HCC_8	Globigerina praebulloides	19.75	21.7898	1	22.7898
1265A_10H6_43	Globigerina praebulloides	20.73	21.8938	1	22.8938
1265A_11H4_123	Globigerina praebulloides	21.95	21.5495	1	22.5495
1265A_12H3_104	Globigerina praebulloides	22.86	21.9469	1	22.9469
1265A_12H3_104	Dentoglobigerina galavisi	22.86	22.8215		22.8215
1265A_12H5_104	Globigerina praebulloides	23.31	21.6282	1	22.6282
1265A_12H5_104	Dentoglobigerina galavisi	23.31	22.6282		22.6282
1265A_13H1_75	Dentoglobigerina galavisi	23.76	22.5793		22.5793
757B_12H1_30	Dentoglobigerina galavisi	23.96	22.0981		22.0981
757B_12H1_96	Dentoglobigerina galavisi	24.7	22.4829		22.4829
126513H6_63	Dentoglobigerina galavisi	24.86	22.7678		22.7678
757B_12H1_120	Dentoglobigerina galavisi	25.03	22.6677		22.6677
1265A_14H2_61	Dentoglobigerina galavisi	25.77	22.3318		22.3318
757B_12H2_88	Dentoglobigerina galavisi	26.402	22.8467		22.8467
1265A_14H5_138.5	Dentoglobigerina galavisi	26.66	22.4004		22.4004
757B_12H3_8	Dentoglobigerina galavisi	27.164	22.8037		22.8037
757B_12H3_79	Dentoglobigerina galavisi	27.9369	22.5762		22.5762
757B_12H3_144	Dentoglobigerina galavisi	28.6445	22.5063		22.5063
757B_12H5_29	Dentoglobigerina galavisi	29.6665	22.5138		22.5138
757B_12H5_110	Dentoglobigerina galavisi	29.8244	22.5909		22.5909
757B_12H6_9	Dentoglobigerina galavisi	29.92	22.6644		22.6644
757B_13H1_57	Dentoglobigerina galavisi	31.5089	22.4537		22.4537
757B_13H1_49	Dentoglobigerina galavisi	31.57	22.3675		22.3675
757B_13H2_100	Dentoglobigerina galavisi	31.9176	22.6889		22.6889
757B_13H3_60	Dentoglobigerina galavisi	32.1177	22.5672		22.5672
757B_13H5_47	Catapsydrax unicavus	32.64	22.8104		22.8104
757B_13H5_47	Dentoglobigerina galavisi	32.64	22.6187		22.6187
757B_13H6_96	Dentoglobigerina galavisi	32.9	22.5228		22.5228
757B_13H6_96	Dentoglobigerina galavisi	32.9	23.2453		23.2453
757B_14HCC_0	Dentoglobigerina galavisi	35.7741	22.9069		22.9069
757B_14HCC_0	Globigerapsis index	35.7741	22.1334	0.7	22.8334
757B_15H1_130	Catapsydrax unicavus	36.22	22.8334		22.8334
757B_15H1_130	Globigerapsis index	36.22	22.387	0.7	23.087
757B_15H4_48	Catapsydrax unicavus	38.2372	23.0013		23.0013
757B_15H6_148	Catapsydrax unicavus	39.1076	23.1651		23.1651
757B_16H5_50	Catapsydrax unicavus	40.354	23.0921		23.0921
757B_16HCC_10	Globigerapsis index	41.136	21.8555	0.7	22.5555
757B_17H1_100	Acarinina bullbrooki	42.0167	22.6174	0.8	23.4174
757B_17H3_100	Globigerapsis index	42.9367	21.7846	0.7	22.4846
757B_18H3_100	Morozovella aragonensis	45.416	21.9221		21.9221
757B_18H3_100	Acarinina bullbrooki	45.416	21.0635	0.8	21.8635
757B_18H5_100	Acarinina bullbrooki	45.994	21.2724	0.8	22.0724
757B_19H1_100	Acarinina bullbrooki	46.5867	21.4292	0.8	22.2292
757B_17H3_100	Globigerapsis index	42.9367	21.7846	0.7	22.4846
757B_15H3_97	Catapsydrax unicavus	37.8634	23.3429		23.3429
757B_15H6_148	Globigerapsis index	39.1076	22.2586	0.7	22.9586
757B_12H4_68	Dentoglobigerina galavisi	29.45	22.4353		22.4353
757B_14H2_49	Dentoglobigerina galavisi	33.74	22.9258		22.9258
757B_15H2_123	Dentoglobigerina galavisi	35.7741	22.7443		22.7443

## Sheet: CS boxcar data
Final boxcar data
d13C boxcar	d34S boxcar longer	boxcar age
	22.6568	43.9568
0.62	22.4872	43.9568
0.48	22.6347	44.468
0.73	22.6321	44.468
0.6	21.8635	45.416
0.66	21.9221	45.416
0.47	22.0724	45.994
0.649444	22.2292	46.5867
0.901333	21.4073	48.06
1.32	21.2366	48.28
0.8475	20.8619	48.49
0.958889	20.7217	48.69
1.165	20.7681	49.07
1.19	20.7565	49.3976
1.115	20.7056	49.4455
0.91	20.7074	49.5451
1.35	20.5426	49.7
0.91625	20.1527	49.8908
0.61125	19.7273	50.9485
0.34	18.9725	51.3029
0.403333	18.7876	51.3887
0.556667	18.6208	51.635
0.204286	18.2492	52.1211
-0.15	18.593	52.28
0.17	18.4298	52.4765
-0.0755556	18.2552	52.7367
0.2625	18.6078	52.837
0.4	18.5576	52.93
-0.3	18.4711	52.9843
0.21	18.5744	53
0.37	18.2911	53.2292
0.509286	18.1909	53.4279
0.85381	18.7878	54.1398
0.898889	18.7844	54.3452
1.00071	18.7388	54.5102
0.918627	18.2774	55.087
1.60111	18.7573	55.3685
1.796	18.5995	55.617
1.876	18.7825	55.9
1.94	18.8315	55.9052
2.06	18.985	55.9379
2.14333	18.7677	56.103
2.19	19.0543	56.1346
2.08667	19.1092	56.1909
1.9175	19.195	56.3907
2.224	19.2566	56.4332
2.27	18.7375	56.684
2.217	18.8532	57.131
2.14714	18.55	57.23
2.16333	19	57.91
2.15	18.95	57.91
2.8	19.03	57.91
2.24	19.35	58
1.8887	19.21	58
1.20154	19.15	59.6
0.984545	19.6	62.2
0.97	20.09	62.4
1.27	20.05	62.49
0.82	20.18	62.5
0.88	20.55	62.5
1.14889	20.38	63.861
1.31333	20.19	64.0147
1.2	19.81	64.015
1.45333	19.96	64.2082
1.45	20.04	64.32
1.35	20	64.5759
1.31	20.04	64.692
1.72	20.24	64.692
1.44	19.93	64.752
1.81	20.37	64.9745
1.64556	19.95	65.17
1.46333	19.94	65.23
1.89714	19.76	66.02
1.23	19.8	66.75
