# Supplementary material for: Cenozoic record of δ34S in foraminiferal calcite implies an early Eocene shift to deep-ocean sulfide burial
Source: Springer Nature journal article supplement (doi:10.1038/s41561-018-0200-y), 2018-08-03
Supplement: MOESM6 [file 41561_2018_200_MOESM6_ESM.pdf]

```

function dcdt = Equations_uncoupled(t,c)

% This script uses 'Definitions_uncoupled.m' and
'Solve_uncoupled.m' to
% then solve for the time dependent solution of sulfur and carbon
in the whole ocean
% based on equations that have:
% 1. CaCO3 output based on a first order rate law with DIC
% 2. The Org C output value based on the fractionation of DIC-Corg
using modernish
% values of 27 permil.
% 3. The reduced sulfur output is tied to the organic carbon
output via
% the classic Berner ratio of 1-3 wt %
% 4. The oxidized sulfur output (evaporites) is a constant (steady
state solution is
% based on a first order
% rate law with [S04]).

global Stot_0 F_32_in del_in_S;

Definitions_uncoupled;

F_C12_red = interp1(timearray, Fredarray, t);
CS_red_ratio = interp1(CS_timearray, CS_array,t);
R = interp1(R_timearray, R_array,t);
F_pyr = interp1(timearray, Fpyarray, t);

ocean3432 = c(S_34)./c(S_32);
ocean32 = c(S_32)./(c(S_34)+c(S_32));
ocean34 = c(S_34)./(c(S_34)+c(S_32));
ocean1312 = c(C_13)./c(C_12);
delSocean = (ocean3432./stdratio_S-1).*1000;
delCocean = (ocean1312./stdratio_C-1).*1000;

F_34_in = ((del_in_S./1000)+1)*stdratio_S.*F_32_in;
%eps_S_red = ((del_in_S - delS_0).*(F_32_in+ F_34_in))./
((F_C12_red_start./CS_red_ratio)+F_C12_red_start./
CS_red_ratio.*(((delS_0-30)./1000)+1).*stdratio_S);
%k_evapnew = (F_32_in + F_34_in - F_C12_red_start./CS_red_ratio -
F_C12_red_start./CS_red_ratio.*(((delS_0+eps_0)./
1000)+1).*stdratio_S)./(Stot_0.*VolOcean);
F_Evap = F_32_in + F_34_in - Fpy_start./CS_0 - Fpy_start./
CS_0.*(((delSocean + eps_ave)./1000)+1).*stdratio_S;

% delC_0 = del_C_foram_start + d13C_offset; %
Initial isotope ratio of ocean in permil
% RatioC_0 = ((delC_0./1000)+1)*stdratio_C; % Initial isotope ratio
in mol_34/mol_32
%
% Ctot_0 = dic.*1029; % Initial total [DIC] in ocean in
mol/m^3
% c0(C_12) = Ctot_0./(1+RatioC_0); % Initial C-12 [DIC] of
ocean in mol/m^3

```

```
% c0(C_13) = RatioC_0.*c0(C_12);
```

```
F_pyr_mar = R.*F_C12_red./CS_red_ratio;
```

```
%%%%%%%%% C13 and C12 Carbon Mass Balance %%%%%%%%%%
```

```
dcdt(C_12) = (F_12_in - (F_C12_red + k_caco3.*c(C_12).*Vol0ocean))./  
Vol0ocean;
```

```
dcdt(C_13) = (F_13_in - (k_caco3.*c(C_12).*Vol0ocean.*ocean1312 +  
F_C12_red.*...  
(((delCocean+eps_C)./1000)+1).*stdratio_C))./Vol0ocean;
```

```
%%%%%%%%% S32 and S34 Sulfur Mass Balance %%%%%%%%%%
```

```
% dcdt(S_32) = (F_32_in - (R.*F_C12_red_start./CS_0 + (1-  
R).*F_C12_red_start./CS_0 + F_Evap.*ocean32))./Vol0ocean;
```

```
% dcdt(S_34) = (F_34_in - (F_Evap.*ocean34 +...  
% R.*F_C12_red_start./CS_0.*(((delSocean+eps_S_mar)./  
1000)+1).*stdratio_S + (1-R).*F_C12_red_start./CS_0).*(((delSocean  
+eps_S_ter)./1000)+1).*stdratio_S))./Vol0ocean;
```

```
dcdt(S_32) = (F_32_in - (R.*F_pyr./CS_0 + (1-R).*F_pyr./CS_0 +  
F_Evap.*ocean32))./Vol0ocean;
```

```
dcdt(S_34) = (F_34_in - (F_Evap.*ocean34 +...  
R.*F_pyr./CS_0.*(((delSocean+eps_S_mar)./1000)+1).*stdratio_S  
+ (1-R).*F_pyr./CS_0.*(((delSocean+eps_S_ter)./  
1000)+1).*stdratio_S))./Vol0ocean;
```

```
dcdt = dcdt';
```
